# Supplementary material for: Personalized Atrophy Risk Mapping in Age-Related Macular Degeneration
Source: PubMed Central journal article supplement — Transl Vis Sci Technol. 2021 Nov 12;10(13):18. doi: 10.1167/tvst.10.13.18 (PMC8590159; doi:10.1167/tvst.10.13.18), 2021-11-12
Supplement: tvst-10-13-18_s001.pdf [file tvst-10-13-18_s001.pdf]

## Supplementary Material

|       |                                     | Input: baseline acquisition |               |              |              |              |                |
|-------|-------------------------------------|-----------------------------|---------------|--------------|--------------|--------------|----------------|
|       |                                     | t=0<br>(baseline)           | 0<t<1<br>year | 1<t<2 years  | 2<t<3 years  | 3<t<4 years  | t > 4<br>years |
| K = 3 | Mean Dice score<br>(total RORA)     | <b>0.85</b>                 | <b>0.79</b>   | 0.79         | <b>0.74</b>  | <b>0.78</b>  | <b>0.83</b>    |
|       | Mean Dice score<br>(RORA growth)    | -                           | <b>0.47</b>   | 0.56         | <b>0.60</b>  | 0.64         | <b>0.75</b>    |
|       | Mean square root<br>area error [mm] | 0.143                       | 0.195         | 0.229        | <b>0.296</b> | 0.366        | <b>0.327</b>   |
| K = 5 | Mean Dice score<br>(total RORA)     | <b>0.85</b>                 | 0.78          | <b>0.80</b>  | 0.73         | <b>0.78</b>  | 0.80           |
|       | Mean Dice score<br>(RORA growth)    | -                           | 0.46          | <b>0.57</b>  | 0.59         | <b>0.65</b>  | 0.72           |
|       | Mean square root<br>area error [mm] | 0.126                       | <b>0.188</b>  | <b>0.219</b> | 0.309        | <b>0.263</b> | <b>0.327</b>   |
| K = 7 | Mean Dice score<br>(total RORA)     | 0.83                        | 0.76          | 0.78         | 0.70         | 0.74         | 0.68           |
|       | Mean Dice score<br>(RORA growth)    | -                           | 0.42          | 0.53         | 0.55         | 0.59         | 0.57           |
|       | Mean square root<br>area error [mm] | <b>0.124</b>                | 0.250         | 0.282        | 0.352        | 0.296        | 0.669          |

**Table 4.** Ablation study, impact of number of output channels/Taylor series terms in testing scenario A, comparison to manual ground-truth

|       |                                  | Input: previous visit acquisition |                   |               |
|-------|----------------------------------|-----------------------------------|-------------------|---------------|
|       |                                  | 0 < t < 6months                   | 6 < t < 12 months | t > 12 months |
| K = 3 | Mean Dice score (total RORA)     | 0.83                              | 0.83              | <b>0.88</b>   |
|       | Mean Dice score (RORA growth)    | <b>0.44</b>                       | <b>0.47</b>       | 0.63          |
|       | Mean square root area error [mm] | 0.180                             | <b>0.198</b>      | 0.205         |
| K = 5 | Mean Dice score (total RORA)     | <b>0.84</b>                       | <b>0.87</b>       | <b>0.88</b>   |
|       | Mean Dice score (RORA growth)    | <b>0.44</b>                       | <b>0.47</b>       | <b>0.64</b>   |
|       | Mean square root area error [mm] | <b>0.159</b>                      | 0.204             | <b>0.189</b>  |
| K = 7 | Mean Dice score (total RORA)     | 0.82                              | 0.807             | 0.87          |
|       | Mean Dice score (RORA growth)    | 0.41                              | 0.43              | 0.61          |
|       | Mean square root area error [mm] | 0.210                             | 0.285             | 0.262         |

**Table 5.** Ablation study, impact of number of output channels/Taylor series terms in testing scenario B, comparison to manual ground-truth

|                                       |                                        | Input: baseline acquisition |               |              |              |              |                |
|---------------------------------------|----------------------------------------|-----------------------------|---------------|--------------|--------------|--------------|----------------|
|                                       |                                        | t=0<br>(baseline)           | 0<t<1<br>year | 1<t<2 years  | 2<t<3 years  | 3<t<4 years  | t > 4<br>years |
| Model<br>pretrained<br>on<br>Imagenet | Mean Dice score<br>(total RORA)        | <b>0.85</b>                 | <b>0.78</b>   | <b>0.80</b>  | <b>0.73</b>  | <b>0.78</b>  | <b>0.80</b>    |
|                                       | Mean Dice score<br>(RORA growth)       | -                           | <b>0.46</b>   | <b>0.57</b>  | <b>0.59</b>  | <b>0.65</b>  | <b>0.72</b>    |
|                                       | Mean square<br>root area error<br>[mm] | <b>0.126</b>                | <b>0.188</b>  | <b>0.219</b> | <b>0.309</b> | <b>0.263</b> | <b>0.327</b>   |
| Random<br>initialization              | Mean Dice score<br>(total RORA)        | 0.82                        | <b>0.78</b>   | 0.75         | 0.68         | 0.71         | 0.70           |
|                                       | Mean Dice score<br>(RORA growth)       | -                           | 0.44          | 0.49         | 0.53         | 0.54         | 0.60           |
|                                       | Mean square<br>root area error<br>[mm] | 0.186                       | 0.270         | 0.290        | 0.250        | 0.301        | 0.616          |

**Table 6.** Ablation study, impact of using network pretrained on ImageNet vs random initialization in testing scenario A, comparison to manual ground-truth

|                              |                                  | Input: previous visit acquisition |                   |               |
|------------------------------|----------------------------------|-----------------------------------|-------------------|---------------|
|                              |                                  | 0 < t < 6months                   | 6 < t < 12 months | t > 12 months |
| Model pretrained on Imagenet | Mean Dice score (total RORA)     | <b>0.84</b>                       | <b>0.87</b>       | <b>0.88</b>   |
|                              | Mean Dice score (RORA growth)    | <b>0.44</b>                       | <b>0.47</b>       | <b>0.64</b>   |
|                              | Mean square root area error [mm] | <b>0.159</b>                      | <b>0.204</b>      | <b>0.189</b>  |
| Random initialization        | Mean Dice score (total RORA)     | 0.81                              | 0.83              | 0.85          |
|                              | Mean Dice score (RORA growth)    | 0.41                              | 0.46              | 0.59          |
|                              | Mean square root area error [mm] | 0.211                             | 0.229             | 0.239         |

**Table 7.** Ablation study, impact of using network pretrained on ImageNet vs random initialization in testing scenario B, comparison to manual ground-truth

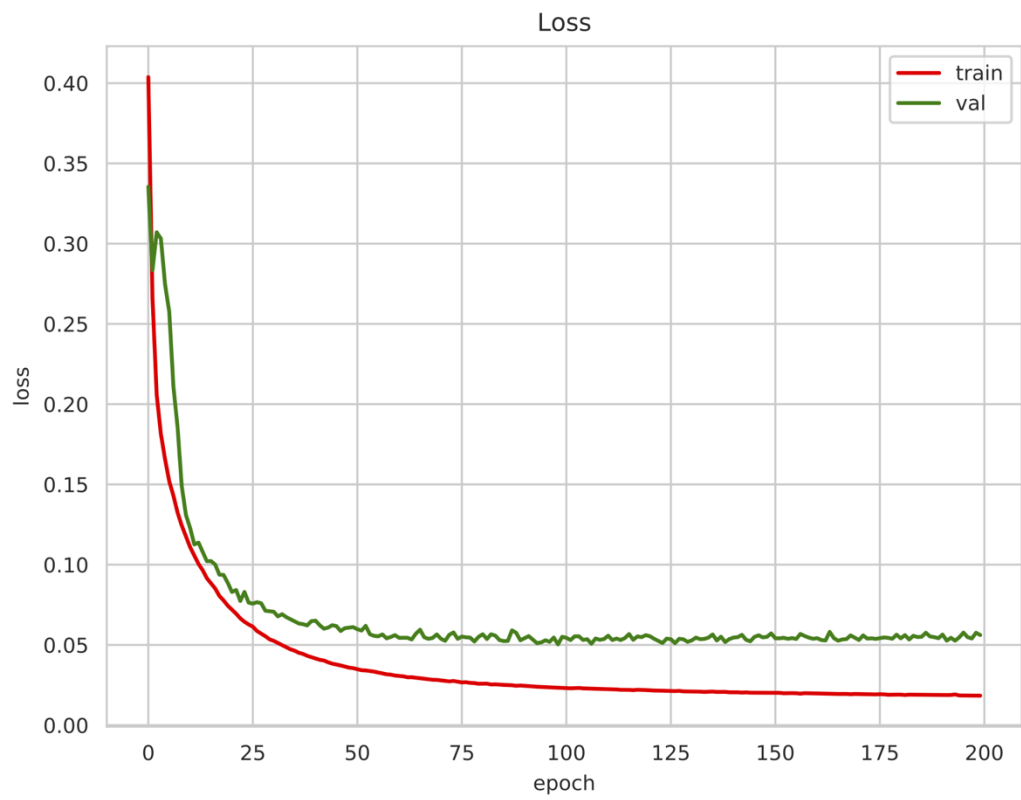

**Figure 1.** Learning curves.
